# Supplementary material
Source: PubMed Central journal article supplement (PMC7709712)
Supplement: NIHMS1646205-supplement-Supplemental_tables.pdf [file NIHMS1646205-supplement-Supplemental_tables.pdf]

## Supplementary data

**Supplemental Table 1. Primer sequences used to characterize E6927E.**

| <b>Locus</b> | <b>Primer</b> | <b>Sequence</b>         | <b>Reference</b> |
|--------------|---------------|-------------------------|------------------|
| ITS          | ITS1          | TCCGTAGGTGAACCTGCGG     | [21]             |
| ITS          | ITS4          | TCCTCCGCTTATTGATATGC    | [21]             |
| SSU          | NS1           | GTAGTCATATGCTTGTCTC     | [21]             |
| SSU          | SR7R          | AGTTAAAAAGCTCGTAGTTG    | [22]             |
| LSU          | LR0R          | ACCCGCTGAACTTAAGC       | [23]             |
| LSU          | LR7           | TACTACCACCAAGATCT       | [24]             |
| TEF1         | 983F          | GCYCCYGGHCAYCGTGAYTTYAT | [25]             |
| TEF1         | 2218R         | ATGACACCRACRGCRCRGTGTG  | [25]             |

**Supplemental Table 2. Organisms used to phylogenetically characterize E6927E.**

| <b>Taxon</b>                      | <b>Voucher</b>           | <b>LSU</b> | <b>ITS</b> | <b>SSU</b> | <b>TEF1</b> |
|-----------------------------------|--------------------------|------------|------------|------------|-------------|
| E6927E                            |                          | KT265342   | HM992803   | KT265343   | KT265344    |
| <i>Amphiporthe castanea</i>       | CBS 392.93               | AF277128   |            | AF277117   |             |
| <i>Apioplagiostoma aceriferum</i> | CBS 781.79               | AF277129   |            | AF277111   |             |
| <i>Cryphonectria parasitica</i>   | CMW 13749                | JN940857   | JN942326   | JN938759   |             |
| <i>Cryptodiaporthe corni</i>      | ATCC 66834               | AF277133.1 |            | AF277119   |             |
| <i>Diaporthe aspalathi</i>        | CBS 117168               |            | KC343035   |            |             |
| <i>Diaporthe convolvuli</i>       | CBS 124654               |            | KC343054   |            |             |
| <i>Diaporthe detrusa</i>          | CBS 109770               |            | KC343061   |            |             |
| <i>Diaporthe fibrosa</i>          | CBS 109751               |            | KC343099   |            |             |
| <i>Diaporthe helianthi</i>        | CBS 344.94               |            | KC343114   |            |             |
| <i>Diaporthe helianthi</i>        | CBS 592.81               |            | KC343115   |            |             |
| <i>Diaporthe impulsa</i>          | CBS 114434               |            | KC343121   |            |             |
| <i>Diaporthe padi var. padi</i>   | CBS 114200               |            | KC343169   |            |             |
| <i>Diaporthe woodii</i>           | CBS 558.93               |            | KC343244   |            |             |
| <i>Discula destructiva</i>        | ATCC 76230               | AF362568   | DQ323528   |            | EU221981    |
| <i>Gnomonia comari</i>            | GK1                      | EF212857   | EF212845   |            |             |
| <i>Gnomonia fragariae</i>         | GF2                      | EF212850   | EF212832   |            |             |
| <i>Gnomonia fragariae</i>         | UN22                     | EF212851   | EF212833   |            |             |
| <i>Gnomonia fragariae</i>         | M1                       | EF212852   | EF212834   |            |             |
| <i>Gnomonia fragariae</i>         | F5.6                     | EF212855   | EF212840   |            |             |
| <i>Gnomonia fragariae</i>         | SER1                     | EF212854   | EF212841   |            |             |
| <i>Gnomonia fragariae</i>         | CBS 146.64               | EF212856   | EF212844   |            |             |
| <i>Gnomonia gnomon</i>            | UPS C2607                |            | EF212849   |            |             |
| <i>Gnomonia ribicola</i>          | CBS 115443               | DQ368626   |            | DQ368658   |             |
| <i>Gnomonia rosae</i>             | CBS 850.79               | EF212858   | EF212846   |            |             |
| <i>Gnomonia rostellata</i>        | CBS 856.79               | EF212860   | EF212848   |            |             |
| <i>Gnomonia rubi</i>              | CBS 102.72               | EF212859   | EF212847   |            |             |
| <i>Melanconis alni</i>            | CBS 109773               | AF408371   |            |            |             |
| <i>Melanconis marginalis</i>      | CBS 109744               | AF408373   |            |            |             |
| <i>Melanconis marginalis</i>      | ATCC 56907<br>CBS 109778 | AF277144   |            | AF277122   |             |
| <i>Melanconis stilbostoma</i>     | / AR 3501                | AF408374   | DQ323524.1 | NG_013198  | EU221886.1  |
| <i>Plagiostoma euphorbiae</i>     | CBS 340.78               |            | DQ323532   |            | GU354016    |
| <i>Prostheciium acerinum</i>      | CBS 120525               | EU039996   | EU039968   |            | EU040024    |
| <i>Prostheciium acerinum</i>      | CBS 120524               | EU039995   | EU039969   |            | EU040023    |
| <i>Prostheciium acerinum</i>      | CBS 117025               | EU039993   | EU039982   |            | EU040027    |
| <i>Prostheciium acerophilium</i>  | D6                       | EU039994   |            |            | EU040028    |
| <i>Prostheciium ellipsosporum</i> | CBS 115073               |            | EU039965   |            | EU039999    |
| <i>Prostheciium ellipsosporum</i> | CBS 121692               | EU039986   |            |            | EU039998    |
| <i>Prostheciium opalus</i>        | D48                      | EU039997   |            |            | EU040020    |
| <i>Prostheciium pyriforme</i>     | CBS 117028               |            | EU039973   |            | EU040008    |
| <i>Prostheciium pyriforme</i>     | CBS 117040               | EU039991   | EU039977   |            | EU040016    |
| <i>Prostheciium pyriforme</i>     | CBS 117041               | EU039992   | EU039976   |            | EU040017    |
| <i>Prostheciium pyriforme</i>     | CBS 117023               | EU039987   | EU039971   |            | EU040001    |
| <i>Stilbospora macrosperma</i>    | CBS121692                | JX517294.1 | JX517285.1 |            |             |
| <i>Stilbospora macrosperma</i>    | CBS 121693               | JX517295.1 | JX517286.1 |            |             |
| <i>Stilbospora macrosperma</i>    | CBS 121883               | JX517299.1 | JX517290.1 |            |             |
| <i>Stilbospora macrosperma</i>    | CBS 121882               | JX517298   | JX517289   |            |             |
| <i>Stilbospora macrosperma</i>    | CBS 121695               | JX517297   | JX517288   |            |             |
| <i>Stilbospora macrosperma</i>    | CBS 121694               | JX517296   | JX517287   |            |             |
| <i>Valsa ceratosperma</i>         | AR3426                   | AF408387   |            |            |             |
| <b>Outgroup</b>                   |                          |            |            |            |             |
| <i>Magnaporthe grisea</i>         | Ina168                   | AB026819.1 | AB026819.1 | AB026819.1 |             |
